# Supplementary material for: Underlying mechanism of CO2 adsorption onto conjugated azacyclo-copolymers: N-doped adsorbents capture CO2 chiefly through acid–base interaction?
Source: Royal Society of Chemistry journal article supplement (doi:10.1039/c9ta04785a), 2019-01-01
Supplement: c9ta04785a1.pdf [file c9ta04785a1.pdf]

## Supporting Information

# **Underlying mechanism of CO<sub>2</sub> adsorption onto conjugated azacyclo-copolymers: N-doped adsorbents capture CO<sub>2</sub> chiefly through acid-base interaction?**

Shi-Chao Qi, Ju-Kang Wu, Jie Lu, Guo-Xing Yu, Rong-Rong Zhu, Yu Liu, Xiao-Qin Liu and Lin-Bing Sun\*

State Key Laboratory of Materials-Oriented Chemical Engineering, Jiangsu National Synergetic Innovation Center for Advanced Materials (SICAM), College of Chemical Engineering, Nanjing Tech University, Nanjing 211816, China

\*Corresponding author. E-mail: lbsun@njtech.edu.cn

## Supplementary Tables

**Table S1.** Zero-point energies of first-principle optimized geometries of four monomers and HCl.

| Material | Geometry                                                                            | Zero-point energy (Hartree) |
|----------|-------------------------------------------------------------------------------------|-----------------------------|
| 3AM      | 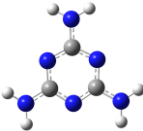   | -446.073235                 |
| 2AM      |    | -430.016216                 |
| 3CL      |    | -1658.476871                |
| 2CL      |   | -1642.441762                |
| HCl      |  | -460.645646                 |

**Table S2.** Formation potential of first-principle optimized geometry of dimer composed by 3AM and 3CL.

| Dimer   | Geometry                                                                            | Zero-point energy (Hartree) | Formation potential (kcal/mol) |
|---------|-------------------------------------------------------------------------------------|-----------------------------|--------------------------------|
| 3AM-3CL | 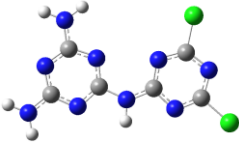 | -1643.926612                | -13.9                          |

**Table S3.** Formation potentials of first-principle optimized geometries of dimers composed by 3AM and 2CL.

| Dimer     | Geometry                                                                          | Zero-point energy (Hartree) | Formation potential (kcal/mol) |
|-----------|-----------------------------------------------------------------------------------|-----------------------------|--------------------------------|
| 3AM-2CL-1 | 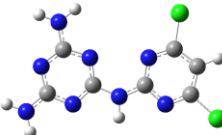 | -1627.887557                | -11.4                          |
| 3AM-2CL-2 |  | -1627.881985                | -7.9                           |
| 3AM-2CL-3 |  | -1627.893908                | -15.4                          |

**Table S4.** Formation potentials of first-principle optimized geometries of dimers composed by 2AM and 3CL.

| Dimer     | Geometry                                                                            | Zero-point energy (Hartree) | Formation potential (kcal/mol) |
|-----------|-------------------------------------------------------------------------------------|-----------------------------|--------------------------------|
| 2AM-3CL-1 | 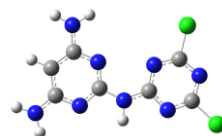 | -1627.872282                | -15.6                          |
| 2AM-3CL-2 |  | -1627.870239                | -14.3                          |
| 2AM-3CL-3 |  | -1627.881204                | -21.2                          |

**Table S5.** Formation potentials of first-principle optimized geometries of dimers composed by 2AM and 2CL.

| Dimer     | Geometry                                                                            | Zero-point energy (Hartree) | Formation potential (kcal/mol) |
|-----------|-------------------------------------------------------------------------------------|-----------------------------|--------------------------------|
| 2AM-2CL-1 | 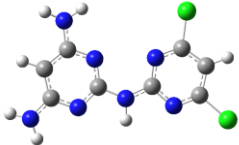   | -1611.832803                | -12.8                          |
| 2AM-2CL-2 |    | -1611.839248                | -16.9                          |
| 2AM-2CL-3 |    | -1611.827444                | -9.5                           |
| 2AM-2CL-4 |    | -1611.830772                | -11.6                          |
| 2AM-2CL-5 |  | -1611.841832                | -18.5                          |
| 2AM-2CL-6 |  | -1611.837980                | -16.1                          |
| 2AM-2CL-7 |  | -1611.833275                | -13.1                          |
| 2AM-2CL-8 |  | -1611.824042                | -7.3                           |
| 2AM-2CL-9 |  | -1611.837260                | -15.6                          |

**Table S6.** Textural characteristics and elemental contents of the samples.

| Copolymer | $S_{\text{BET}}$ (m <sup>2</sup> /g) | $V_{\text{pore}}$ (cm <sup>3</sup> /g) | Theoretical N content<br>(%, wt) | Elemental analysis (%, wt) |     |      |           |
|-----------|--------------------------------------|----------------------------------------|----------------------------------|----------------------------|-----|------|-----------|
|           |                                      |                                        |                                  | C                          | H   | N    | O and ash |
| 3AM3CL    | 894                                  | 0.864                                  | 62.7                             | 34.2                       | 2.2 | 59.4 | 4.2       |
| 3AM2CL    | 196                                  | 0.601                                  | 56.0                             | 37.8                       | 2.8 | 53.2 | 6.2       |
| 2AM3CL    | 105                                  | 0.535                                  | 56.0                             | 39.5                       | 3.3 | 52.3 | 4.9       |
| 2AM2CL    | 47                                   | 0.347                                  | 49.2                             | 43.9                       | 3.7 | 46.8 | 5.6       |

**Table S7.** The energies of LUMO ( $\pi^*$ )<sup>a</sup>, HOMO<sup>b</sup>, and highest occupied conjugated- $\pi$  orbital of copolymers.

| Orbital                       | 3AM3CL                                                                              | 3AM2CL                                                                              | 2AM3CL                                                                               | 2AM2CL                                                                                |
|-------------------------------|-------------------------------------------------------------------------------------|-------------------------------------------------------------------------------------|--------------------------------------------------------------------------------------|---------------------------------------------------------------------------------------|
| LUMO ( $\pi^*$ )              | 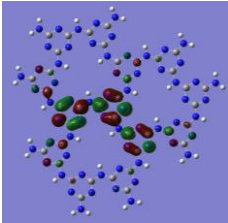  |   |   |   |
| $E_{\text{LUMO}}/\text{eV}$   | -1.66                                                                               | -1.68                                                                               | -1.87                                                                                | -1.59                                                                                 |
| HOMO                          |  |  |  |  |
| $E_{\text{HOMO}}/\text{eV}$   | -5.00                                                                               | -4.74                                                                               | -4.69                                                                                | -4.30                                                                                 |
| Conjugated $\pi$              |  |  |  |  |
| $E_{\pi}/\text{eV}$           | -8.56                                                                               | -8.84                                                                               | -9.08                                                                                | -9.46                                                                                 |
| $\Delta E$ ( $\pi^*-\pi$ )/eV | 6.89                                                                                | 7.15                                                                                | 7.21                                                                                 | 7.87                                                                                  |

<sup>a</sup> LUMO, lowest unoccupied molecular orbital; <sup>b</sup> HOMO, highest occupied molecular orbital.

**Table S8.** Parameters for the derivation of functional relationship between  $C_{\text{ads}}$  and  $D_{\text{neg}}$  at 0 °C and 25 °C.

| Adsorbent | $\varepsilon^a$ | $S_{\text{BET}}$ (m <sup>2</sup> /g) | $\sigma$ (10 <sup>-19</sup> m <sup>2</sup> ) <sup>b</sup> | $D_{\text{neg}}$ (mmol/g) <sup>c</sup> | $C_{\text{ads},0}$ (mmol/g) | $C_{\text{ads},25}$ (mmol/g) |
|-----------|-----------------|--------------------------------------|-----------------------------------------------------------|----------------------------------------|-----------------------------|------------------------------|
| 3AM3CL    | 3               | 894                                  | 6.573                                                     | 6.775                                  | 3.10                        | 2.01                         |
| 3AM2CL    | 2               | 196                                  | 6.678                                                     | 0.975                                  | 1.21                        | 0.60                         |
| 2AM3CL    | 2               | 105                                  | 6.810                                                     | 0.512                                  | 1.10                        | 0.56                         |
| 2AM2CL    | 1               | 47                                   | 6.891                                                     | 0.113                                  | 0.99                        | 0.52                         |

<sup>a</sup>  $\varepsilon$ , the masking factor for each copolymer indicating the average number of unshielded negative ESP sites in a triangular intramolecular cave ( $\varepsilon = 3, 2, 2,$  and  $1$  for 3AM3CL, 3AM2CL, 2AM3CL, and 2AM2CL, respectively); <sup>b</sup>  $\sigma$ , the first-principle calculated average area of one hexagonal structure in corresponding copolymer (m<sup>2</sup>); <sup>c</sup>  $D_{\text{neg}}$ , the effective density of the negative potential sites on the interface.

**Table S9.** Negative ESP extremum of representative N-based CO<sub>2</sub> adsorption sites calculated with first-principle.

| N-based CO <sub>2</sub> adsorption site                         | Negative ESP extremum (eV) |
|-----------------------------------------------------------------|----------------------------|
| NH <sub>3</sub>                                                 | -0.070                     |
| NH <sub>2</sub> NH <sub>2</sub>                                 | -0.058                     |
| H <sub>2</sub> NCH <sub>2</sub> CH <sub>2</sub> NH <sub>2</sub> | -0.064                     |
| Et <sub>2</sub> NH                                              | -0.051                     |
| Et <sub>3</sub> N                                               | -0.042                     |
| Aniline                                                         | -0.033                     |
| Indole                                                          | -0.035                     |
| Pyridine                                                        | -0.059                     |
| Quinoline                                                       | -0.056                     |

**Table S10.** Textural properties of the SU-MAC adsorbents of Ref. 45 and the estimated effective N content.

| Materials  | $S_{\text{BET}}$               | N content | CO <sub>2</sub> capacity at 298K | $S_{\text{BET}}$ ratio | Effective N content ratio <sup>a</sup> | CO <sub>2</sub> capacity ratio |
|------------|--------------------------------|-----------|----------------------------------|------------------------|----------------------------------------|--------------------------------|
|            | m <sup>2</sup> g <sup>-1</sup> | %, wt     | mmol g <sup>-1</sup>             |                        |                                        |                                |
| SU-MAC-500 | 941                            | 5.8       | 4.50                             | 0.397                  | 0.720                                  | 1.447                          |
| SU-MAC-600 | 1500                           | 4.0       | 4.18                             | 0.633                  | 0.791                                  | 1.344                          |
| SU-MAC-800 | 2369                           | 3.2       | 3.11                             | 1.000                  | 1.000                                  | 1.000                          |

<sup>a</sup>, Effective N content ratio is estimated through N content multiplying by  $S_{\text{BET}}$  ratio.

## Supplementary Figures

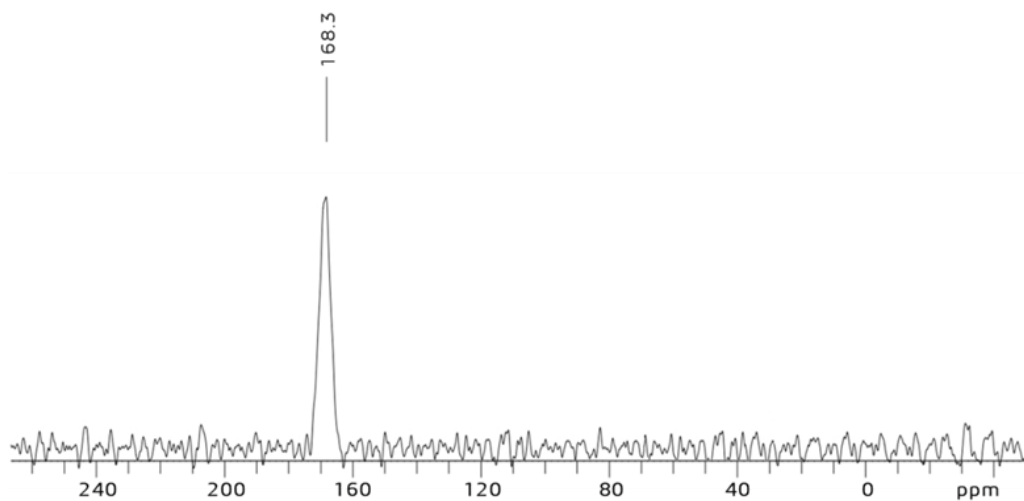

**Fig. S1.** Solid state  $^{13}\text{C}$ -NMR spectrum of 3AM3CL.  $\delta = 168.3$  ppm, C atoms of triazine rings bonding  $-\text{NH}-$ .

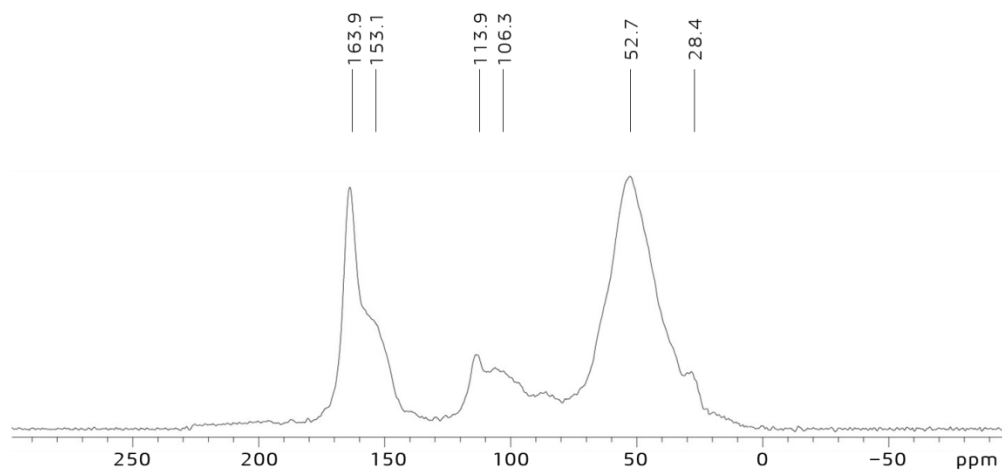

**Fig. S2.** Solid state  $^{13}\text{C}$ -NMR spectrum of 3AM2CL.  $\delta = 163.9$  and  $153.1$  ppm, C atoms bonding  $-\text{NH}-$ ;  $\delta = 113.9$ ,  $106.3$ ,  $52.7$ , and  $28.4$  ppm,  $5'$ -C atoms of pyrimidine rings.

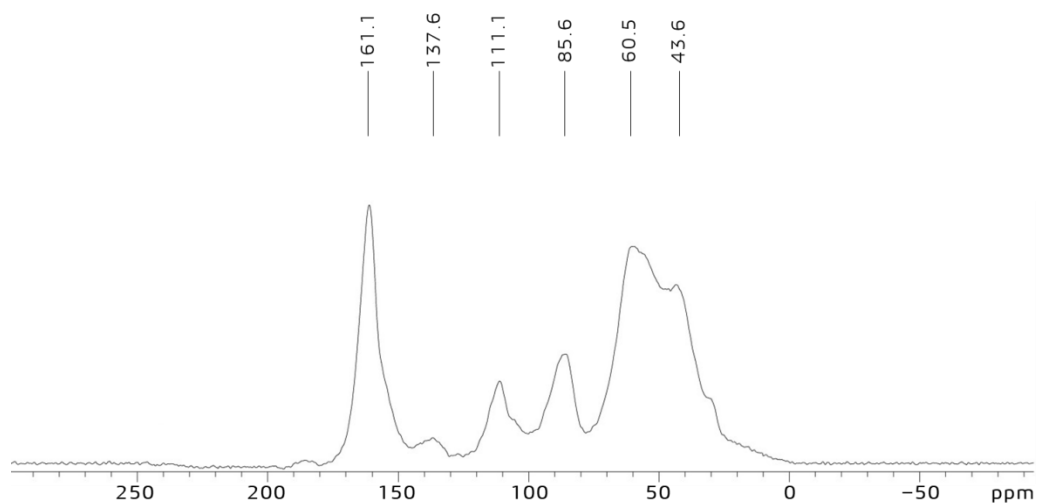

**Fig. S3.** Solid state  $^{13}\text{C}$ -NMR spectrum of 2AM3CL.  $\delta = 161.1$  and  $137.6$  ppm, C atoms bonding  $-\text{NH}-$ ;  $\delta = 111.1$ ,  $85.6$ ,  $60.5$ , and  $43.6$  ppm,  $5'$ -C atoms of pyrimidine rings.

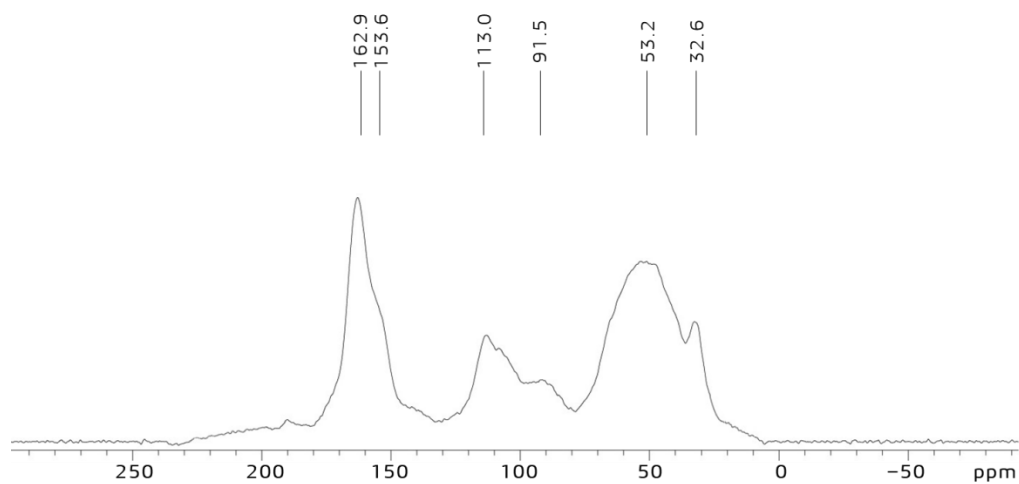

**Fig. S4.** Solid state  $^{13}\text{C}$ -NMR spectrum of 2AM2CL.  $\delta = 162.9$  and  $153.6$  ppm, C atoms bonding  $-\text{NH}-$ ;  $\delta = 113.0$ ,  $91.5$ ,  $53.2$ , and  $32.6$  ppm,  $5'$ -C atoms of pyrimidine rings.



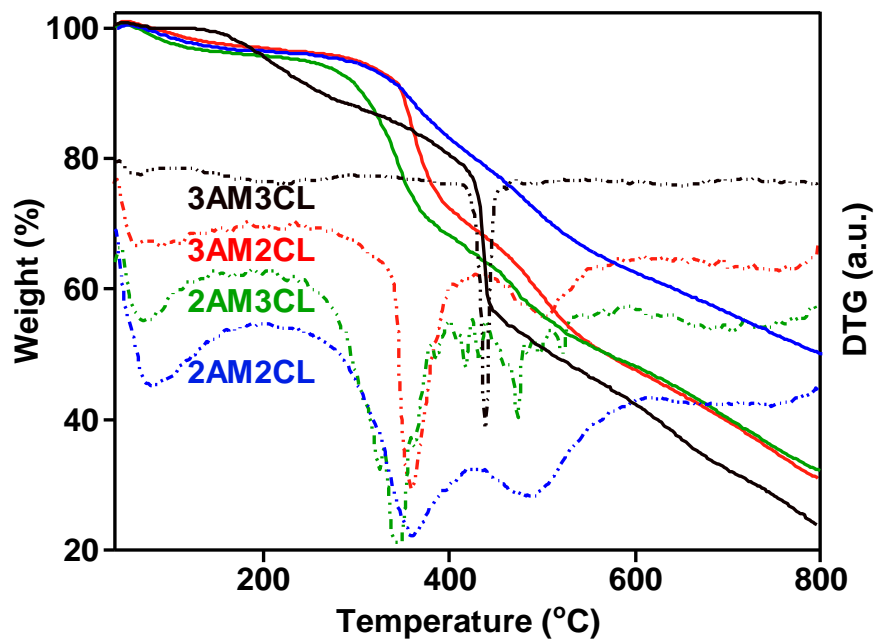

Fig. S5. TG and DTG profiles of four copolymers.

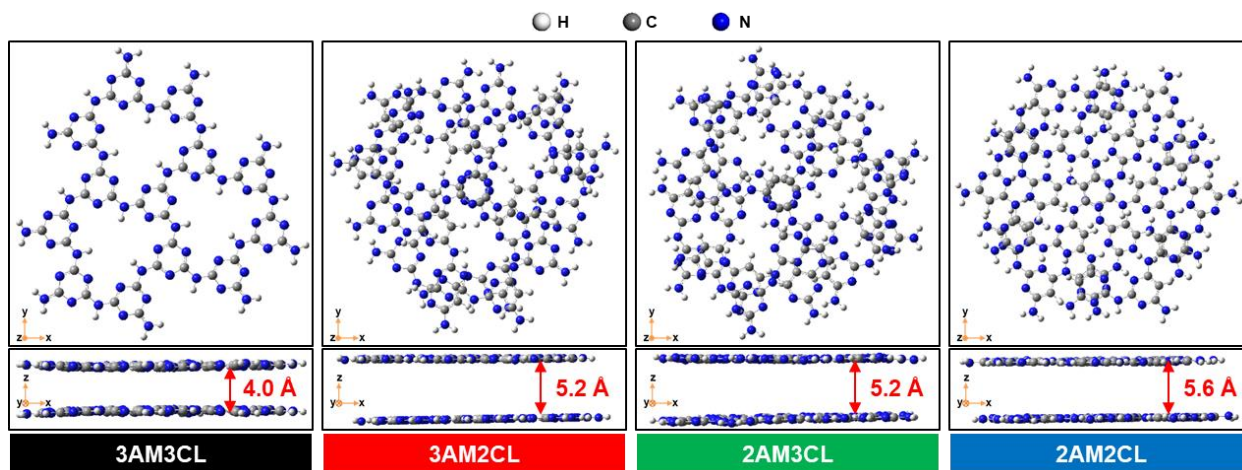

Fig. S6. The representative configuration of interaction between two interlayers of a copolymer.

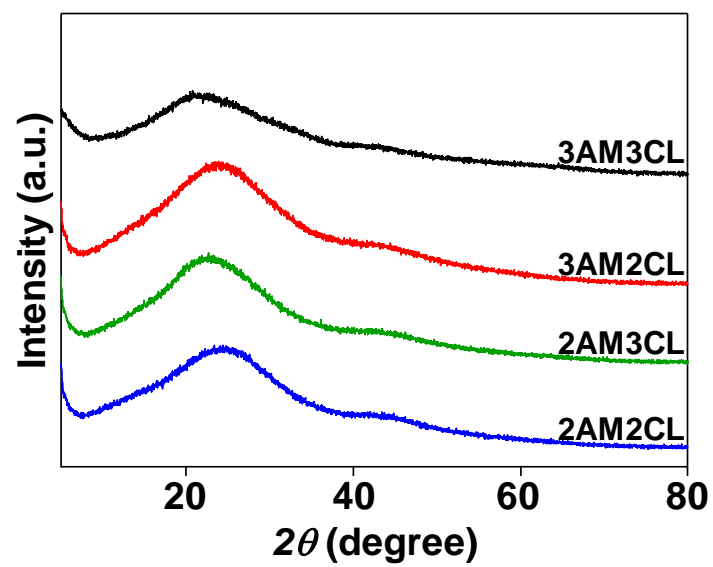

Fig. S7. XRD patterns of four copolymers.

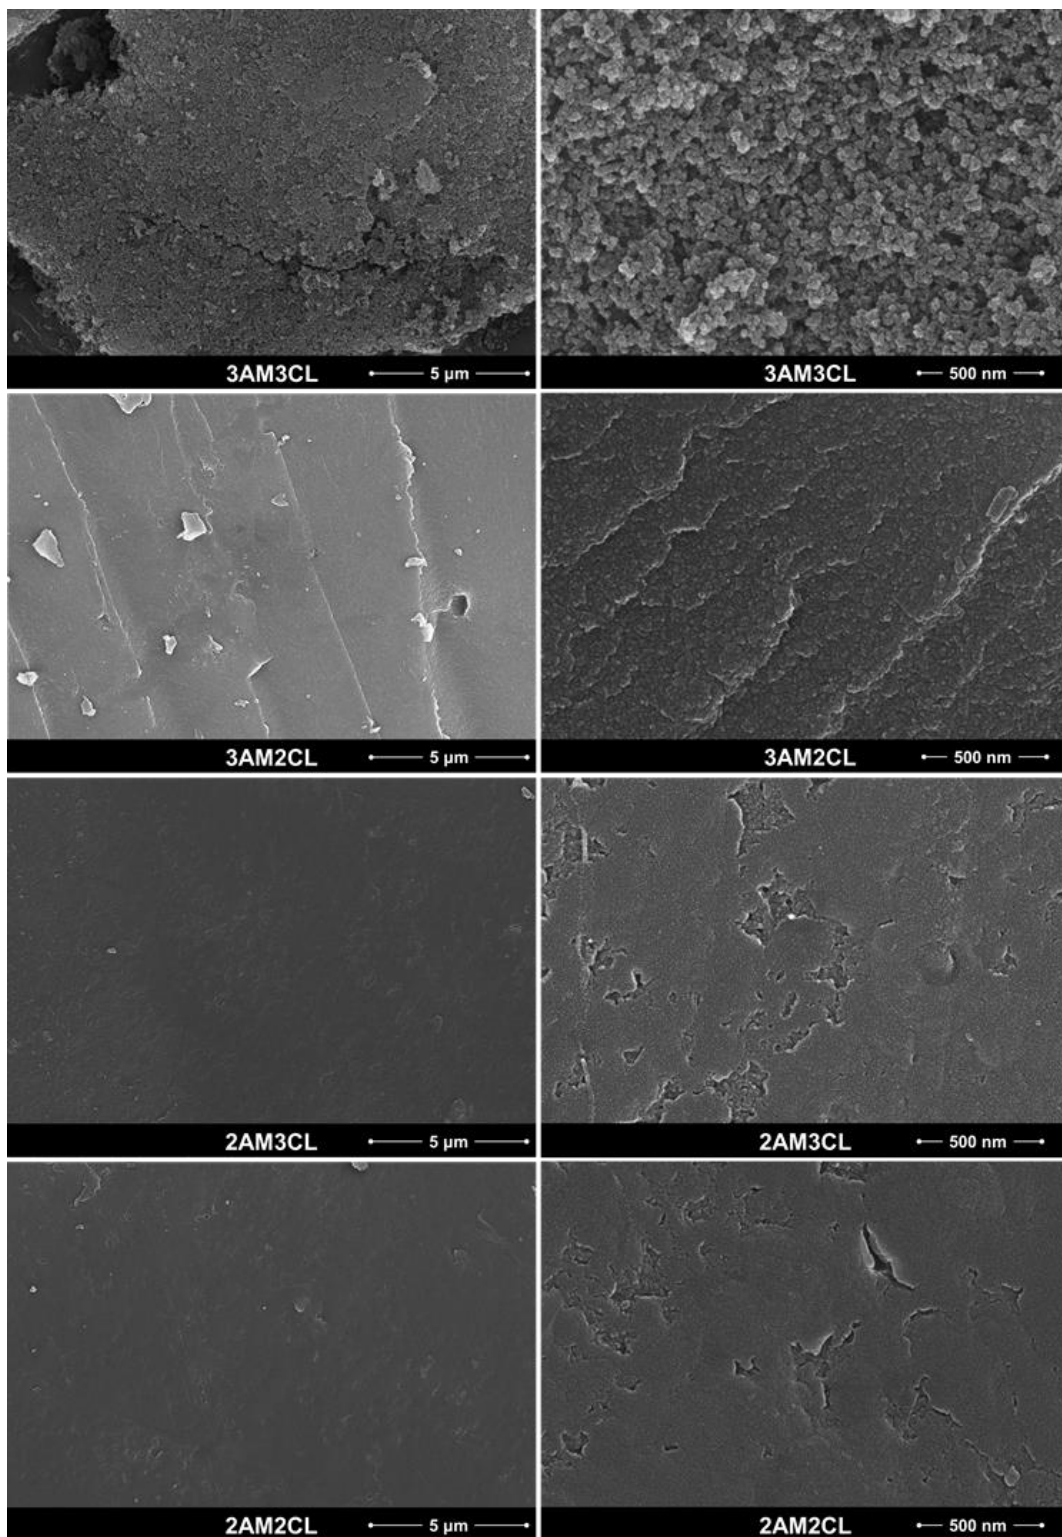

**Fig. S8.** SEM images of four copolymers.

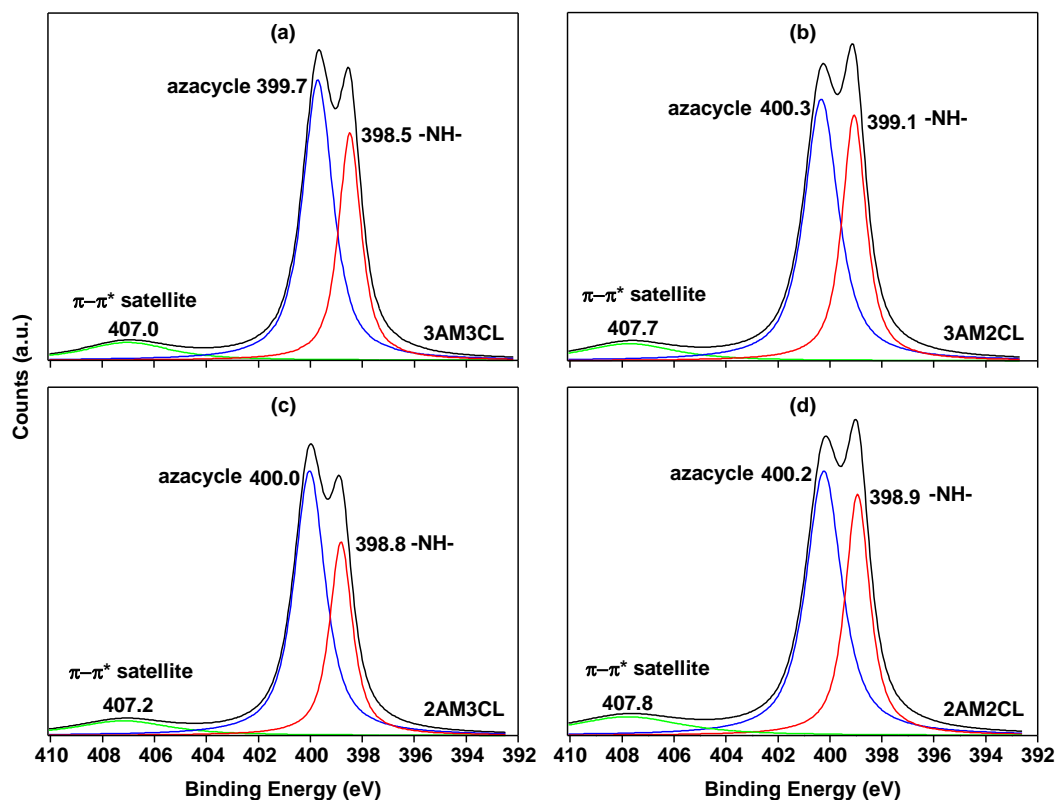

Fig. S9. XPS spectra for N1s of four copolymers.

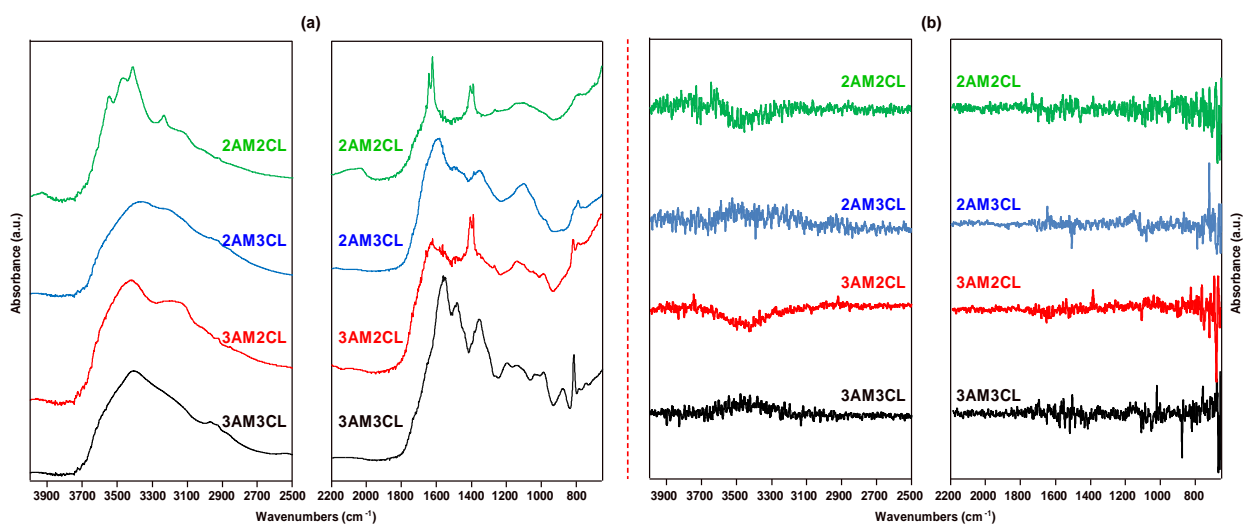

Fig. S10. In-situ DRFTIR spectra of the copolymers (a) and those of net changes after CO<sub>2</sub> adsorption (b). With taken those of the copolymers as background spectra, the in-situ DRFTIR spectra of net changes for the copolymers were recorded after vacuum treatment at 85 °C for 2 h, and the subsequent sufficient gas replacement by CO<sub>2</sub> at 2 bar and 25 °C.

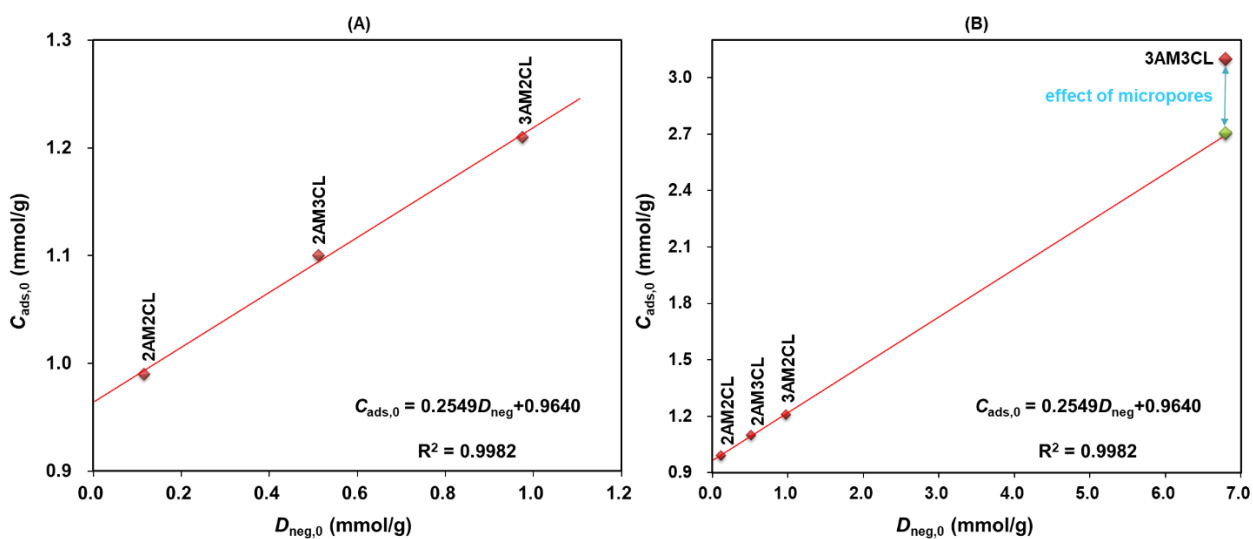

**Fig. S11.** (A) Fitted functional relationship between  $C_{ads,0}$  at 0 °C and  $D_{neg}$  based on 3AM2CL, 2AM3CL, and 2AM2CL; and (B) the risen  $C_{ads,0}$  caused by micropores of 3AM3CL.

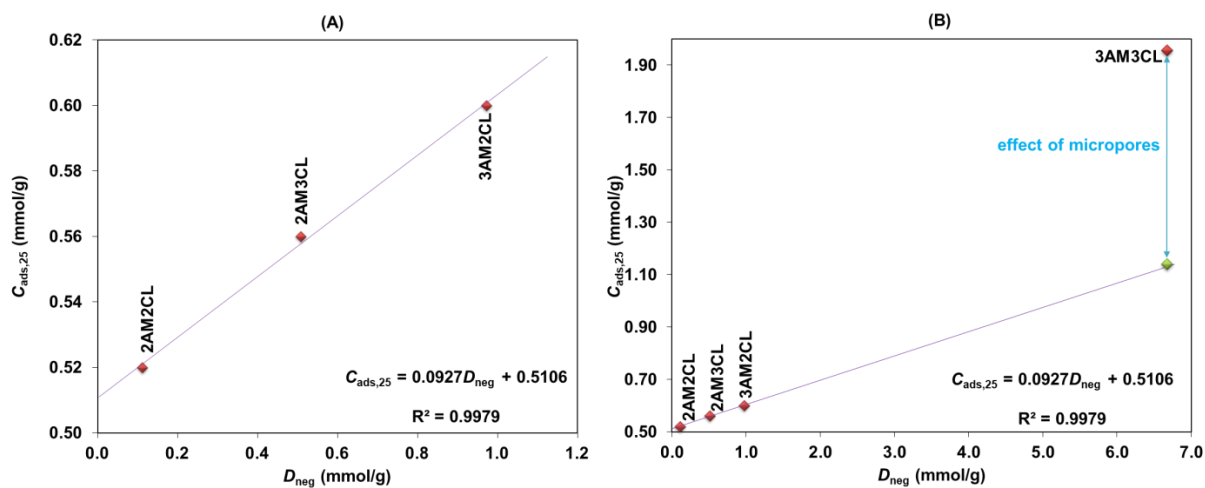

**Fig. S12.** (A) Fitted functional relationship between  $C_{ads,25}$  at 25 °C and  $D_{neg}$  based on 3AM2CL, 2AM3CL, and 2AM2CL; and (B) the risen  $C_{ads,25}$  caused by micropores of 3AM3CL.

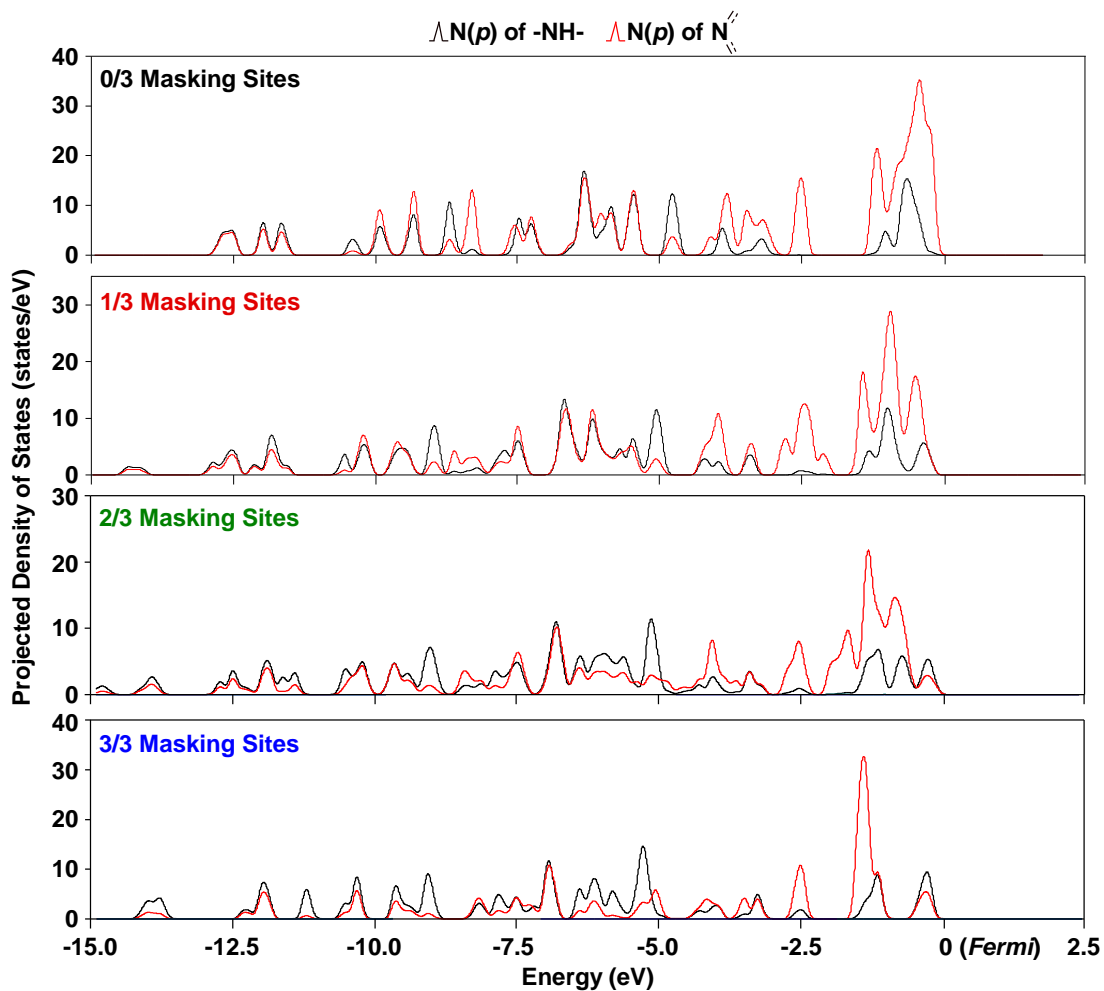

Fig. S13. Projected density of states of 0/3, 1/3, 2/3, and 3/3 Masking Sites.

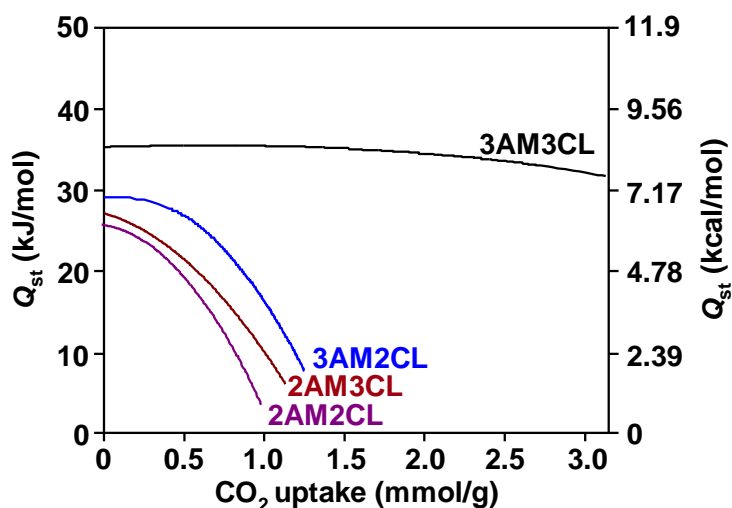

Fig. S14. Isothermic heats ( $Q_{st}$ ) of  $\text{CO}_2$  adsorption over the four copolymers.  $Q_{st}$  were calculated from the data of  $\text{CO}_2$  uptake at the temperatures of  $0^\circ\text{C}$  and  $25^\circ\text{C}$ , fitted with a virial-type expression.

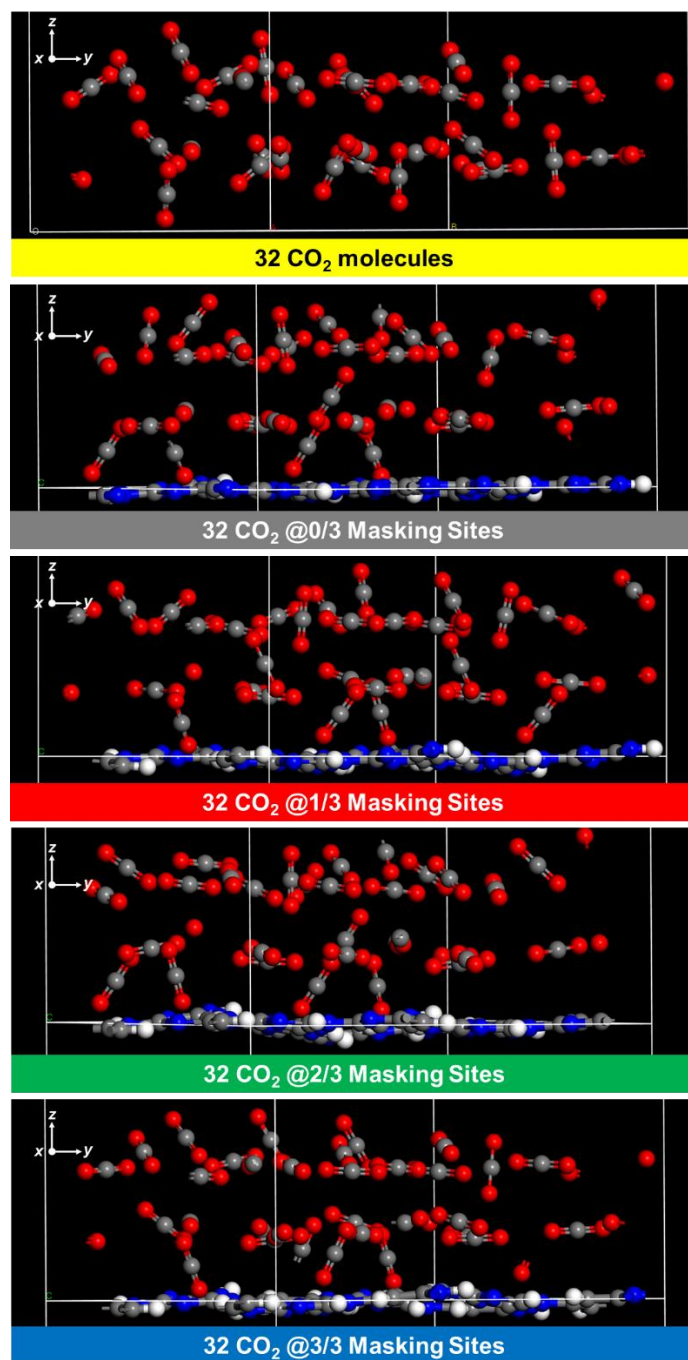

**Fig. S15.** The condensed states of 32 CO<sub>2</sub> molecules onto different Masking Sites.

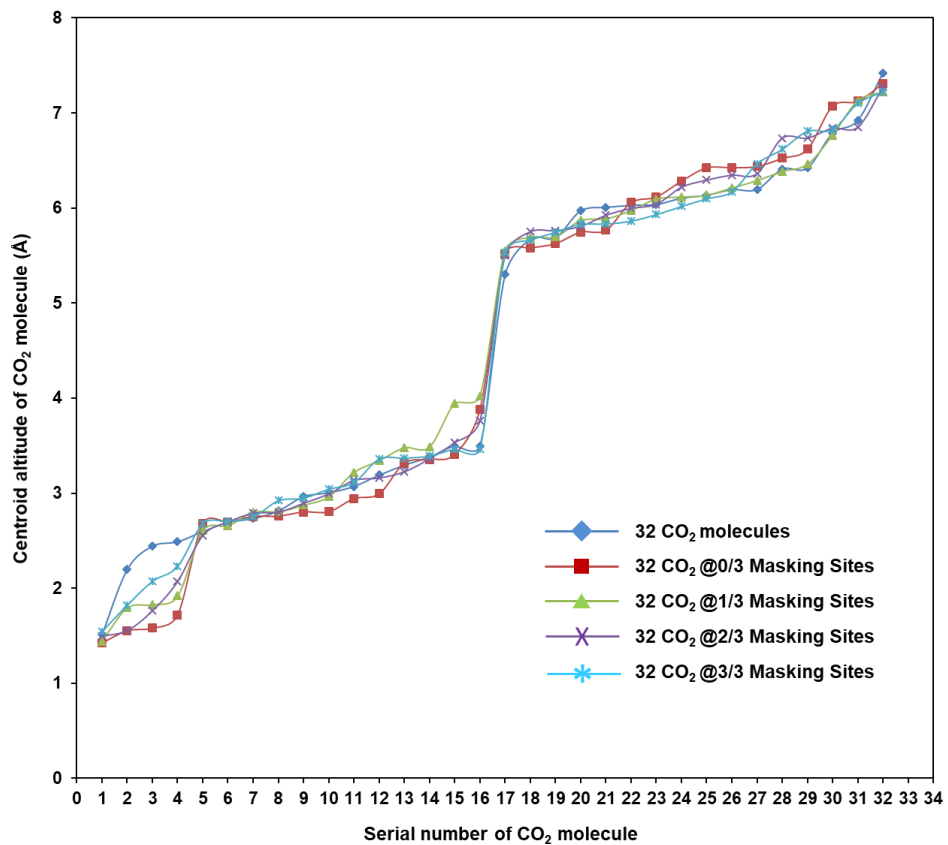

**Fig. S16.** The centroid altitude distribution of 32 CO<sub>2</sub> molecules onto different Masking Sites.



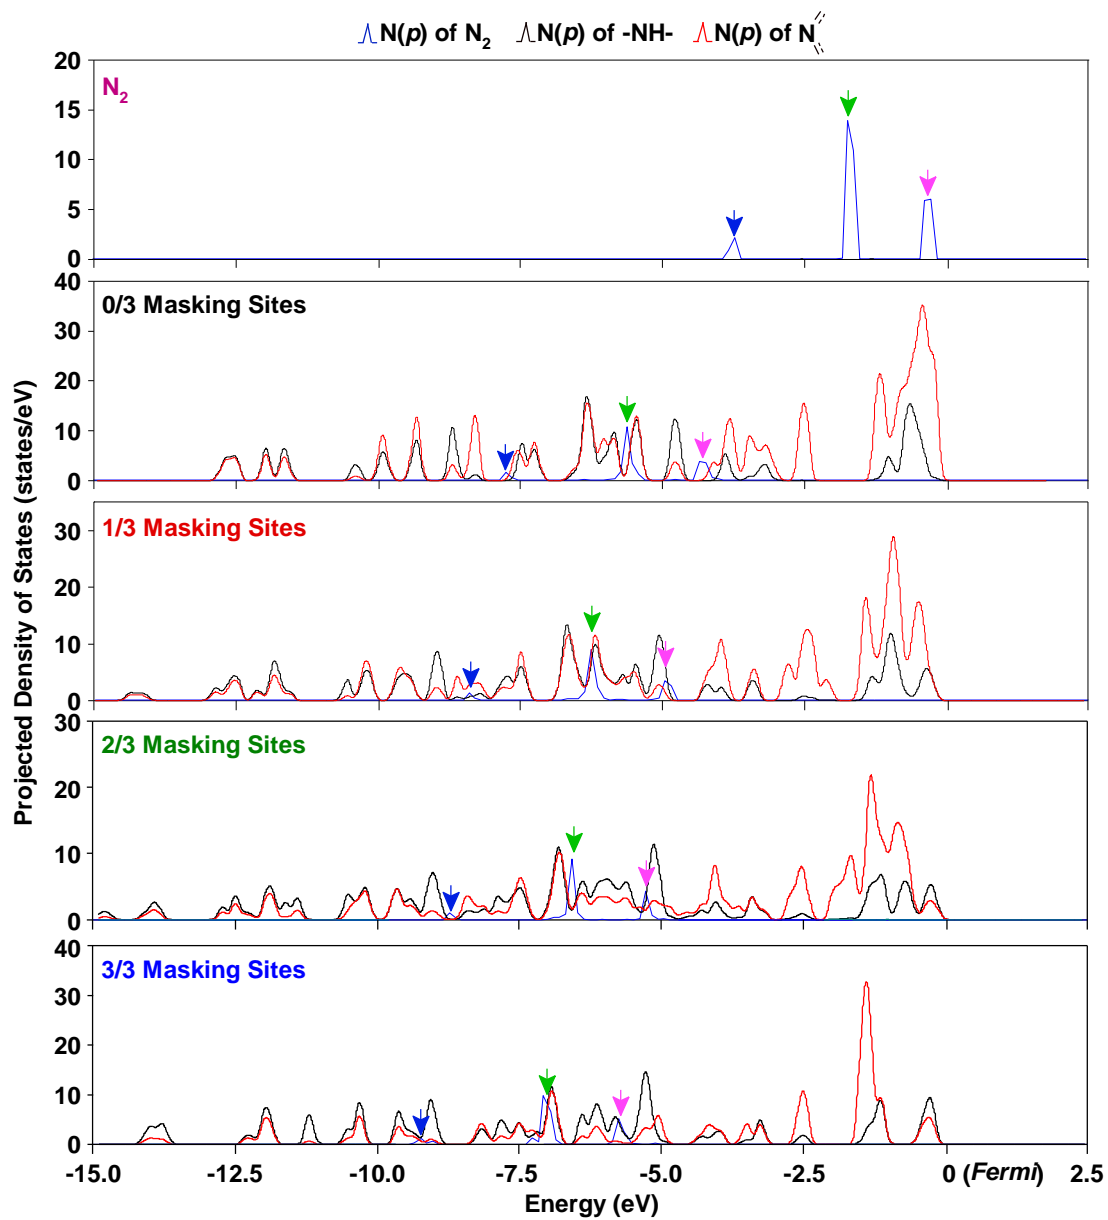

Fig. S17. Projected density of states of  $N_2$  molecule adsorbed on the 0/3, 1/3, 2/3, and 3/3 Masking Sites.
